# Supplementary material for: Specific deformation behavior of isotactic polypropylene films under a multiaxial stress field
Source: Royal Society of Chemistry journal article supplement (doi:10.1039/d2sm00147k), 2022-01-01
Supplement: d2sm00147k1.pdf [file d2sm00147k1.pdf]

Submitted to *Soft Matter*

**Supporting Information**

**Specific Deformation Behavior of Isotactic Polypropylene Film  
under Multiaxial Stress Field**

Ken Kojio<sup>1,2,3\*</sup>, Aya Fujimoto<sup>1</sup>, Chigusa Nagano<sup>2</sup>, Shuhei Nozaki<sup>2</sup>,  
Kazutoshi Yokomachi<sup>1</sup>, Kazutaka Kamitani<sup>1</sup>, Hirohmi Watanabe<sup>1</sup>, Atsushi Takahara<sup>1,2\*</sup>

<sup>1</sup>*Institute for Materials Chemistry and Engineering*, <sup>2</sup>*Graduate School of Engineering*,

<sup>3</sup>*WPI-ICNER, Kyushu University*

*744 Motooka, Nishi-ku, Fukuoka, 819-0395, Japan*

*Phone: +81-92-802-2517, Fax: +81-92-802-2518*

\*Authors to whom correspondence should be addressed.

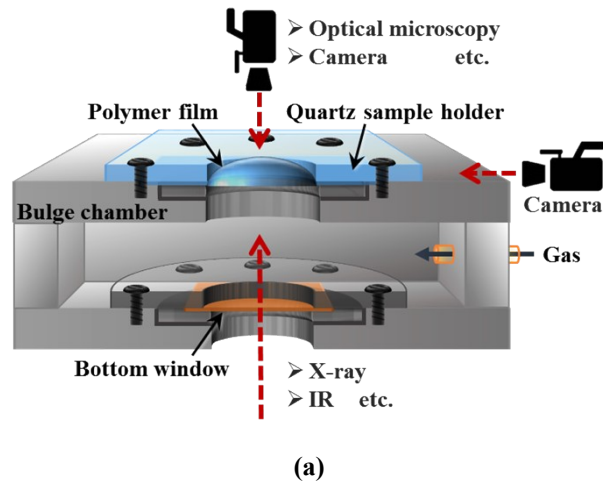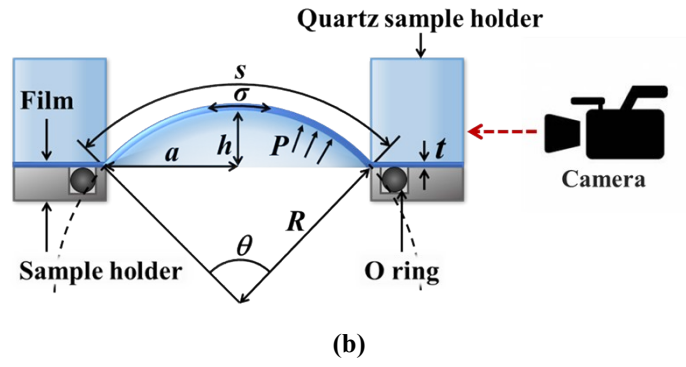

**Figure S1.** Schematic illustration of (a) home-made bulge chamber and (b) various parameters during bulge deformation.

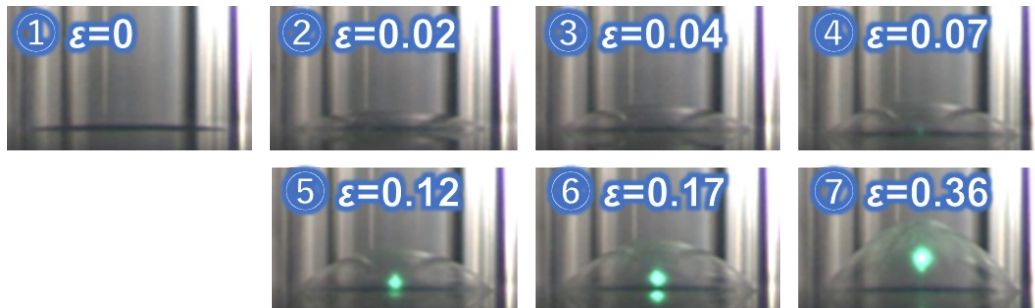

**Figure S2** Side view images of the *it* PP films at various strains.

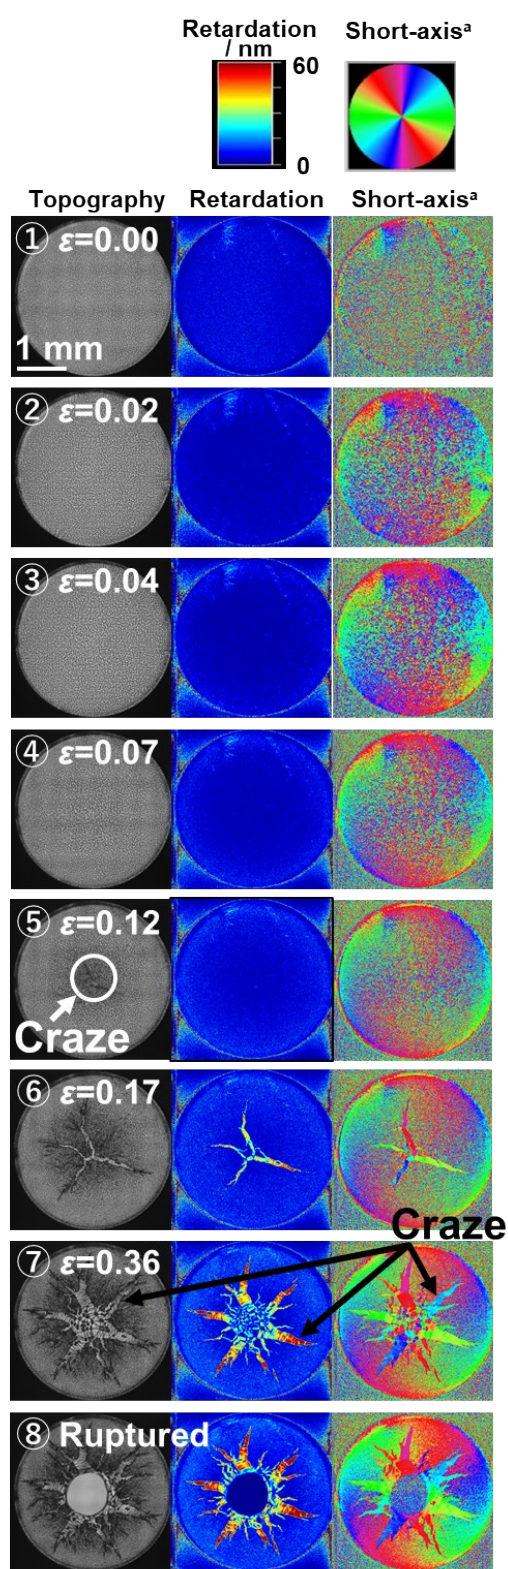

<sup>a</sup> Direction of short-axis of refractive index ellipsoid

**Figure S3.** Polarized high-speed camera images of isotactic polypropylene films with a thickness of 8  $\mu\text{m}$  at various strains by bulge testing. The three inset images correspond to topography, retardation, and the direction of short-axis of the refractive index ellipsoid from left to right.

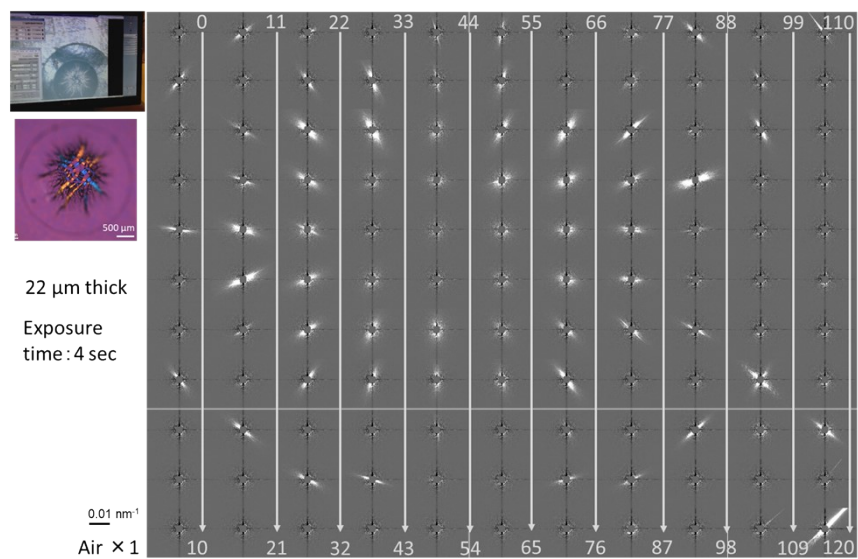

**Figure S4.** Ultra small-angle X-ray scattering (USAXS) patterns at various positions inside bulge hole.
